# Supplementary material for: DMET-Analyzer: automatic analysis of Affymetrix DMET Data
Source: Springer Nature journal article supplement (doi:10.1186/1471-2105-13-258), 2012-10-05

**a** User chooses the Data File to be loaded.

| CLASS | S1  | S2  | S3  | S4  |
|-------|-----|-----|-----|-----|
| TOX   | TOX | TOX | TOX | TOX |
| C/C   | C/C | C/C | C/C | C/C |
| G/G   | G/G | G/G | G/G | G/G |
| T/T   | T/T | C/T | C/T | C/C |
| G/G   | G/G | G/G | A/G | A/G |
| T/T   | T/T | C/T | C/C | C/C |
| T/T   | C/T | C/T | C/T | C/T |
| A/A   | A/A | A/A | A/A | A/A |
| C/C   | C/T | C/T | C/T | C/T |
| A/A   | A/G | A/G | G/G | G/G |
| G/G   | G/G | G/G | G/G | G/G |
| A/A   | A/G | A/G | G/G | G/G |
| C/C   | C/T | C/T | T/T | T/T |
| T/T   | C/T | C/T | C/C | C/C |

**b** User selects the classes for each sample by clicking on data table.

**c** Allele frequencies for each probe are calculated and shown to the user

| File      | Statistics                       |     | %E  | F    |     |
|-----------|----------------------------------|-----|-----|------|-----|
| A         | Compute exhaustive Fisher's Test | %E  |     | F    |     |
|           | Compute specific Fisher's Test   | %E  |     | F    |     |
| probe_10  | 0.0                              | 0.5 | 0.0 | -0.5 | 0.0 |
| probe_11  | 0.0                              | 0.5 | 0.0 | -0.5 | 0.0 |
| probe_159 | 0.0                              | 0.5 | 0.0 | -0.5 | 0.0 |
| probe_160 | 0.0                              | 0.5 | 0.0 | -0.5 | 0.0 |
| probe_161 | 0.0                              | 0.5 | 0.0 | -0.5 | 0.0 |
| probe_321 | 0.0                              | 0.5 | 0.0 | -0.5 | 0.0 |
| probe_322 | 0.0                              | 0.5 | 0.0 | -0.5 | 0.0 |
| probe_323 | 0.0                              | 0.5 | 0.0 | -0.5 | 0.0 |

Results are calculated

Probe Set ID: [am\\_10001](#)

|        | Healthy |   | Diseased |  |
|--------|---------|---|----------|--|
| c/c    | 6       | 3 |          |  |
| nocall | 0       | 6 |          |  |

Sort by Decreasing P-values
  Sort by Increasing P-values

Number of P-value: 32

**d** User selects the Statistical Test and may visualize distribution.

**e** Results are shown to the user. He may visualize annotations and links to external databases.

Annotations ...

|                                 |                 |
|---------------------------------|-----------------|
| Probe Set ID:                   | AM_10928        |
| dbSNP RS ID:                    | rs187858        |
| Chromosome:                     | 16              |
| Physical Position:              | 16162039        |
| Strand:                         | +               |
| ChrX pseudo-autosomal region 1: | 0               |
| Cytoband:                       | p13.11          |
| Flank:                          | ---             |
| Allele A:                       | ---             |
| Allele B:                       | ---             |
| Associated Gene:                | ENST00000345148 |

NCBI dbSNP Short Genetic Variations

Search:

All: 1 Cited in PubMed: 1 Clinical/SCB Submissions: 0 Human: 1

rs187858 (*Homo sapiens*)

GTGGCCCTGTGGACATTTGGCCCTTCA(C/T)GTGACCAATGGACGAACAACATCC

MAFMinorAlleleCount T=0.043486

HQVS Names [ NC\_000016.9.p.16162039C>+ ] AM\_054866.3:c.1754C>T ] AM\_019888.3:c.1754C>T ] AM\_019882.2:c.1754C>T ] NP\_063853.2:p.Tyr568\* ] NP\_063855.2:p.Tyr568\* ] NP\_054687.2:p.Tyr568\* ] NP\_063854.2:p.Tyr568\* ] NP\_063815.2:p.Tyr568\* ]

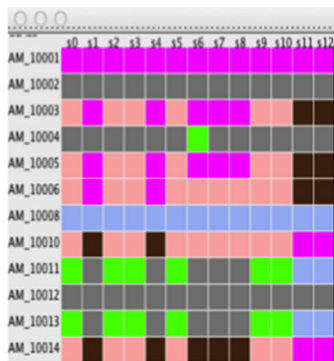

Supplement: 12859_2012_5442_MOESM4_ESM.pdf [file 12859_2012_5442_MOESM4_ESM.pdf]
