# Supplementary material for: DMET-Analyzer: automatic analysis of Affymetrix DMET Data
Source: Springer Nature journal article supplement (doi:10.1186/1471-2105-13-258), 2012-10-05

### Memory Footprint in (kbytes)

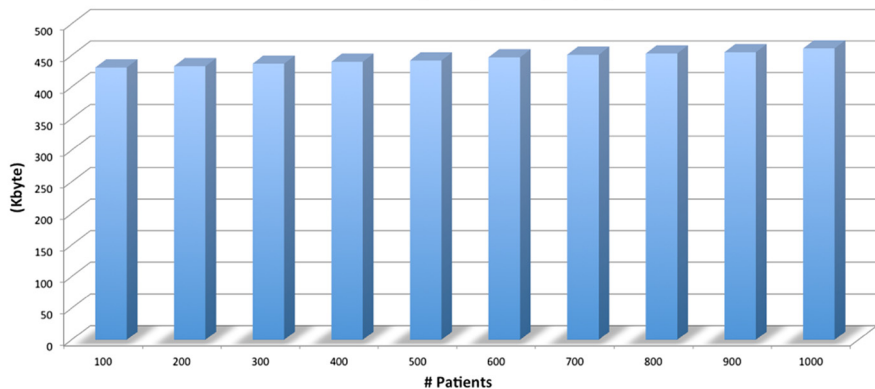

### Execution Time (ms)

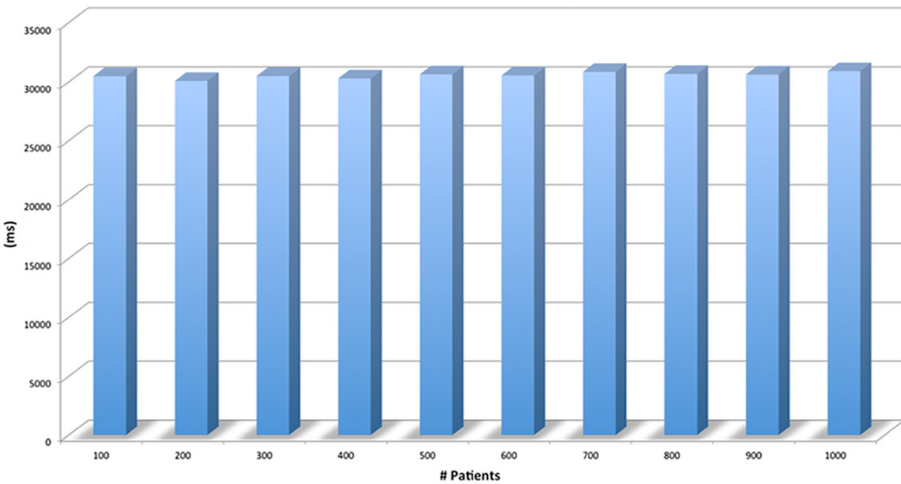

Supplement: 12859_2012_5442_MOESM5_ESM.pdf [file 12859_2012_5442_MOESM5_ESM.pdf]
